# Supplementary material for: Effect of blended teaching on college students' EFL acquisition
Source: Frontiers journal article supplement (doi:10.3389/feduc.2024.1264573), 2024-04-10
Supplement: Data_Sheet_1.PDF [file Data_Sheet_1.PDF]

### 英语六级作文评分标准

|                                                                       |                                              |
|-----------------------------------------------------------------------|----------------------------------------------|
| 英语六级作文评分标准本题满分为 15 分,成绩分为六个档次:13-15 分、10-12 分、7-9 分、4-6 分、1-3 分和 0 分。 |                                              |
| 13-15 分                                                               | 切题。表达思想清楚,文字通顺、连贯,基本上无语言错误,仅有个别小错。           |
| 10-12 分                                                               | 切题。表达思想清楚,文字较连贯,但有少量语言错误。                    |
| 7-9 分                                                                 | 基本切题。有些地方表达思想不够清楚,文字勉强连贯;语言错误相当多,其中有一些是严重错误。 |
| 4-6 分                                                                 | 基本切题。表达思想不清楚,连贯性差。有较多的严重语言错误。                |
| 1-3 分                                                                 | 条理不清,思路紊乱,语言支离破碎或大部分句子均有错误,且多数为严重错误。         |
| 0 分                                                                   | 未作答,或只有几个孤立的词,或作文与主题毫不相关。                    |

### CET6 Essay Grading Scale

|                                                                                                                                                                      |                                                                                                                                                                                                             |
|----------------------------------------------------------------------------------------------------------------------------------------------------------------------|-------------------------------------------------------------------------------------------------------------------------------------------------------------------------------------------------------------|
| The total score for this part is 15 points, and the scores are divided into six grades: 13-15 points, 10-12 points, 7-9 points, 4-6 points, 1-3 points and 0 points. |                                                                                                                                                                                                             |
| 13-15 points                                                                                                                                                         | Clear thoughts, smooth writing, perfect coherence, basically no linguistic errors, only a few minor errors.                                                                                                 |
| 10-12 points                                                                                                                                                         | The ideas are clearly expressed, the text is coherent, but there are a few linguistic errors, including grammatical mistakes or wrong sentence patterns.                                                    |
| 7-9 points                                                                                                                                                           | The expression of ideas is not clear enough, and the words are barely coherent; There are quite a few language errors, some of which are serious, such as grammatical mistakes and false sentence patterns. |
| 4-6 points                                                                                                                                                           | The expression of ideas is unclear and incoherent. There are many serious linguistic errors.                                                                                                                |
| 1-3 points                                                                                                                                                           | Poorly organized, disorganized, fragmented language, or errors in most sentences, and most of them are serious.                                                                                             |
| 0 points                                                                                                                                                             | For not answering or only a few isolated words, or the composition is irrelevant to the topic.                                                                                                              |
